# Supplementary material for: Network pharmacology reveals the potential mechanism of Baiying Qinghou decoction in treating laryngeal squamous cell carcinoma
Source: publisher site journal article supplement (doi:10.18632/aging.203786), 2021-12-20
Supplement: Supplementary file [file aging-v13i24-203786-supplementary-material-SD2.pdf]

## SUPPLEMENTARY TABLE

**Supplementary Table 1. The list of target proteins of key active components in Baiying Qinghou decoction.**

| Target proteins                                                                 | Gene symbol | Target proteins                                      | Gene symbol |
|---------------------------------------------------------------------------------|-------------|------------------------------------------------------|-------------|
| Prostaglandin G/H synthase 1                                                    | PTGS1       | Chymotrypsinogen B                                   | CTRB1       |
| Estrogen receptor                                                               | ESR1        | Beta-1 adrenergic receptor                           | ADRB1       |
| Prostaglandin G/H synthase 2                                                    | PTGS2       | Tumor necrosis factor                                | CD40LG      |
| Heat shock protein HSP 90                                                       | HSP90AA1    | Interleukin-6                                        | IL6         |
| mRNA of PKA Catalytic Subunit C-alpha                                           | PRKACA      | Cellular tumor antigen p53                           | TP53        |
| Beta-lactamase                                                                  | LACTBL1     | Interstitial collagenase                             | MMP1        |
| Progesterone receptor                                                           | PGR         | C-C motif chemokine 2                                | CCL2        |
| Mineralocorticoid receptor                                                      | NR3C2       | Prostaglandin E2 receptor EP3 subtype                | PTGER3      |
| Glucocorticoid receptor                                                         | NR3C1       | Acetylcholinesterase                                 | ACHE        |
| Carbonic anhydrase II                                                           | CA2         | Rhodopsin                                            | RHO         |
| Calmodulin                                                                      | PCP4        | Ferrichrome-iron receptor                            | FHUA        |
| Phosphatidylinositol-4,5-bisphosphate 3-kinase catalytic subunit, gamma isoform | PIK3CG      | Vascular endothelial growth factor A                 | VEGFA       |
| Nitric oxide synthase, inducible                                                | NOS2        | Cell division control protein 2 homolog              | CDK1        |
| Thrombin                                                                        | SERPIND1    | Myeloperoxidase                                      | MPO         |
| Potassium voltage-gated channel subfamily H member 2                            | KCNH2       | Aryl hydrocarbon receptor                            | AHR         |
| Androgen receptor                                                               | AR          | Cytochrome c                                         | CYCS        |
| Sodium channel protein type 5 subunit alpha                                     | SCN5A       | Egl nine homolog 1                                   | EGLN1       |
| Coagulation factor Xa                                                           | F7          | Proto-oncogene serine/threonine-protein kinase Pim-1 | PIM1        |
| Nitric-oxide synthase, endothelial                                              | NOS3        | Cyclin-A2                                            | CCNA2       |
| Alpha-1B adrenergic receptor                                                    | ADRA1B      | Peroxisome proliferator activated receptor delta     | PPARD       |
| Beta-2 adrenergic receptor                                                      | ADRB2       | Heme oxygenase 1                                     | HMOX1       |
| DNA topoisomerase II                                                            | TOP2B       | NAD(P)H dehydrogenase [quinone] 1                    | NQO1        |
| Estrogen receptor beta                                                          | ESR2        | Epidermal growth factor receptor                     | EGFR        |
| Dipeptidyl peptidase IV                                                         | DPP4        | 72 kDa type IV collagenase                           | MMP2        |
| Glycogen phosphorylase, muscle form                                             | PYGM        | Mitogen-activated protein kinase 1                   | MAPK1       |
| Glycogen synthase kinase-3 beta                                                 | GSK3B       | Retinoblastoma-associated protein                    | RB1         |
| Cell division protein kinase 2                                                  | CDK2        | Cell division protein kinase 4                       | CDK4        |
| Serine/threonine-protein kinase Chk1                                            | CHEK1       | Xanthine dehydrogenase/oxidase                       | XDH         |
| Ig gamma-1 chain C region                                                       | IGHG1       | DNA topoisomerase 1                                  | TOP1        |
| Trypsin-1                                                                       | PRSS1       | Amyloid beta A4 protein                              | APBA3       |
| Nuclear receptor coactivator 2                                                  | NCOA2       | Caspase-7                                            | CASP7       |
| Nuclear receptor coactivator 1                                                  | NCOA1       | Interleukin-2                                        | IL2         |
| Calcium-activated potassium channel subunit alpha 1                             | KCNMA1      | Interferon gamma                                     | IFNG        |
| Peroxisome proliferator activated receptor gamma                                | PPARG       | Glutathione S-transferase P                          | GSTP1       |
| Retinoic acid receptor RXR-alpha                                                | RXRA        | Insulin receptor                                     | INSR        |
| CGMP-inhibited 3',5'-cyclic phosphodiesterase A                                 | PDE3A       | Hepatocyte growth factor receptor                    | MET         |
| Alpha-1D adrenergic receptor                                                    | ADRA1D      | Stromelysin-1                                        | MMP3        |
| Mitogen-activated protein kinase 14                                             | MAPK14      | Pro-epidermal growth factor                          | EGF         |
| Alpha-1A adrenergic receptor                                                    | ADRA1D      | NADPH--cytochrome P450 reductase                     | POR         |
| Sodium-dependent serotonin transporter                                          | SLC6A4      | Ornithine decarboxylase                              | ODC1        |
| Amine oxidase [flavin-containing] B                                             | MAOB        | Superoxide dismutase [Cu-Zn]                         | SOD1        |
| Neuronal acetylcholine receptor protein, alpha-7 chain                          | CHRNA7      | 78 kDa glucose-regulated protein                     | HSPA5       |
| cAMP-dependent protein kinase inhibitor alpha                                   | PKIA        | Acetyl-CoA carboxylase 1                             | ACACA       |

|                                                  |          |                                      |         |
|--------------------------------------------------|----------|--------------------------------------|---------|
| Cytochrome P450-cam                              | CYP101A1 | Cytochrome P450 3A4                  | CYP3A4  |
| Dopamine D1 receptor                             | DRD1     | Cytochrome P450 1A2                  | CYP1A2  |
| Muscarinic acetylcholine receptor M3             | CHRM3    | Tissue factor                        | F3      |
| Muscarinic acetylcholine receptor M1             | CHRM1    | Gap junction alpha-1 protein         | GJA1    |
| Gamma-aminobutyric-acid receptor alpha-2 subunit | GABRA2   | Interleukin-1 beta                   | IL1B    |
| Muscarinic acetylcholine receptor M4             | CHRM4    | E-selectin                           | SELE    |
| 5-hydroxytryptamine 2A receptor                  | HTR2A    | Vascular cell adhesion protein 1     | VCAM1   |
| Gamma-aminobutyric-acid receptor alpha-5 subunit | GABRA5   | Estrogen sulfotransferase            | SULT1E1 |
| Gamma-aminobutyric-acid receptor alpha-3 subunit | GABRA3   | Maltase-glucoamylase, intestinal     | MGAM    |
| Muscarinic acetylcholine receptor M2             | CHRM2    | Tissue-type plasminogen activator    | PLAT    |
| Neuronal acetylcholine receptor subunit alpha-2  | CHRNA2   | Thrombomodulin                       | THBD    |
| Mu-type opioid receptor                          | OPRM1    | Collagen alpha-1(I) chain            | COL1A1  |
| Gamma-aminobutyric acid receptor subunit alpha-1 | GABRA1   | Arachidonate 5-lipoxygenase          | ALOX5   |
| Apoptosis regulator Bcl-2                        | BCL2     | Collagen alpha-1(III) chain          | COL3A1  |
| Transcription factor AP-1                        | JUN      | DNA gyrase subunit B                 | GYRB    |
| Serum paraoxonase/arylesterase 1                 | PON1     | Prostatic acid phosphatase           | ACPP    |
| Microtubule-associated protein 2                 | MAP2     | Cathepsin D                          | CTSD    |
| Coagulation factor VII                           | F7       | Glutathione S-transferase Mu 1       | GSTM1   |
| Vascular endothelial growth factor receptor 2    | KDR      | Glutathione S-transferase Mu 2       | GSTM2   |
| Alcohol dehydrogenase 1C                         | ADH1C    | Stromelysin-2                        | MMP10   |
| Alpha-2A adrenergic receptor                     | ADRA2A   | Fatty acid synthase                  | FASN    |
| Sodium-dependent noradrenaline transporter       | SLC6A2   | Catalase                             | CAT     |
| Sodium-dependent dopamine transporter            | SLC6A3   | Cytosolic phospholipase A2           | PLA2G4A |
| Aldose reductase                                 | AKR1B1   | Serine/threonine-protein kinase mTOR | MTOR    |
| Urokinase-type plasminogen activator             | PLAU     | Amine oxidase [flavin-containing] A  | MAOA    |
| Leukotriene A-4 hydrolase                        | LTA4H    |                                      |         |
